# Supplementary material
Source: publisher site journal article supplement (https://www.dovepress.com/article/430252)
Supplement: Supplementary file 1 [file get_supplementary_file.php]

**Table S1. Abbreviation, ICD-9-CM, and definition**

|  | | |
| --- | --- | --- |
|  | **Abbreviation** | **ICD-9-CM / Definition** |
| **Study population:** Endometriosis |  | 617 |
| **Events:** Mental prognosis |  | Any of the listed |
| Psychiatric disorders |  | ≧ 3 outpatient visits or inpatient |
| Anxiety |  | 300 |
| Depression |  | 296.2, 296.3, 300.4, 311 |
| Bipolar |  | 296.0, 296.4 - 296.8 |
| Sleep disorders |  | 307.4, 780.5 |
| Posttraumatic stress disorder / acute stress disorder | PTSD / ASD | 308, 309.81 |
| Dementia |  | 290.0 - 290.4, 290.8, 290.9, 331.0 |
| Eating disorders |  | 307.1, 307.5 |
| Substance-related disorders | SRD | 291, 292, 303.3, 303.9, 304, 305 |
| Psychotic disorders |  | 295, 297-298 |
| Autism |  | 299.0 |
| Other mental disorders |  | 290 - 319 excluding listed above |
| Suicide |  | E950 - E959 |
| All-caused mortality |  | 800 - 999 |
| **Comorbidities:** |  |  |
| Diabetes mellitus | DM | 250 |
| Hypertension | HTN | 401 - 405 |
| Renal disease |  | 580 - 589 |
| Hyperlipidemia |  | 272 |
| Thyrotoxicosis |  | 242 |
| Pneumonia |  | 480 - 486 |
| Chronic liver disease | CLD | 571 |
| Injury |  | 800 - 999 |
| Tumor |  | 140 - 208 |

**Table S2. Incidence and prevalence of mental disorders among different cohorts**

|  | | | | | |
| --- | --- | --- | --- | --- | --- |
|  | **Cohort** | **Population** | **Events** | **PYs** | **Rate** |
| **Incidence** | **Study cohort**: With endometriosis | 20,154 | 4,083 | 188,033.75 | 2,171.42 |
|  | **Comparison cohort**: Without endometriosis, matched | 80,616 | 9,225 | 774,720.65 | 1,190.75 |
|  | **General population**: Without endometriosis, unmatched | 312,869 | 40,124 | 3,001,279.83 | 1,336.90 |
| **Prevalence** | **Study cohort**: With endometriosis | 20,154 | 4,561 | 191,731.20 | 2,378.85 |
|  | **Comparison cohort**: Without endometriosis, matched | 80,616 | 10,724 | 793,842.06 | 1,350.90 |
|  | **General population**: Without endometriosis, unmatched | 321,869 | 45,790 | 3,014,598.64 | 1,518.94 |
| **PYs = Person-years; Rate: per 100,000 PYs** | | | | | |
